# Supplementary material for: Gastrodin Inhibits Virus Infection by Promoting the Production of Type I Interferon
Source: Frontiers journal article supplement (doi:10.3389/fphar.2020.608707), 2021-02-19
Supplement: Image_1.pdf [file Image_1.pdf]

## Supplementary Data

**Supplementary figure 1. GTD did not promote the production of TNF- $\alpha$  and IL-6 in macrophages.**

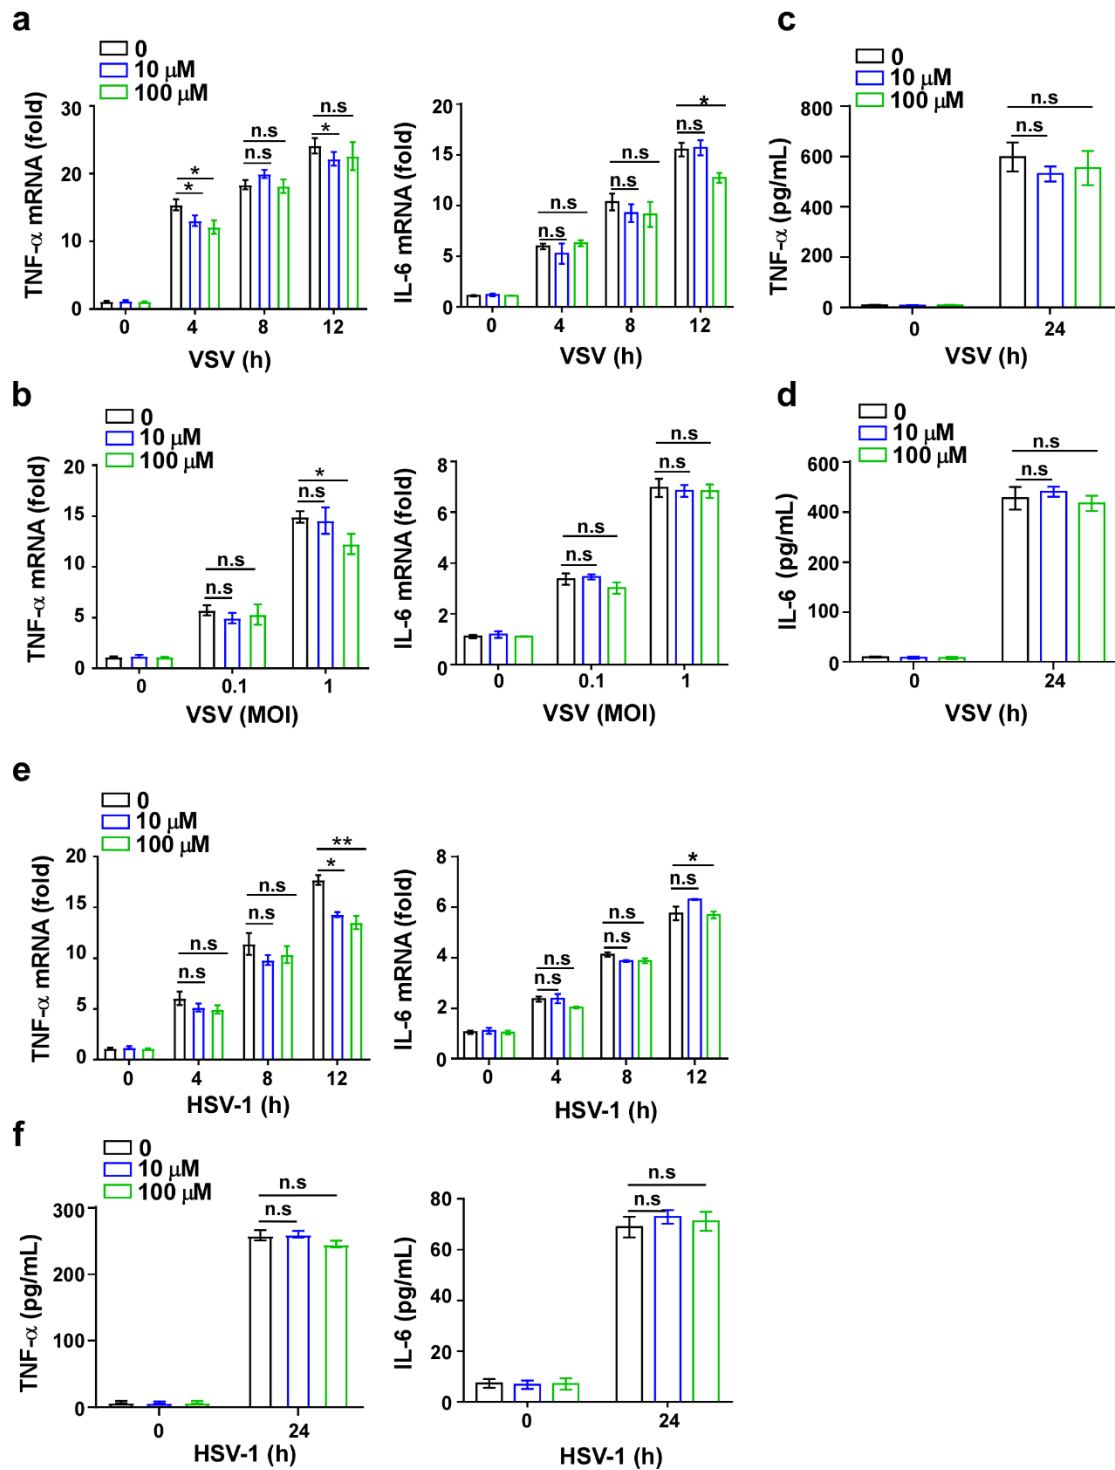

a. qRT-PCR analysis of TNF- $\alpha$  and IL-6 in macrophages treated with 10  $\mu$ M or 100  $\mu$ M GTD followed by infection with VSV for the indicated time. b. qRT-PCR analysis

of TNF- $\alpha$  and IL-6 in macrophages treated with 10  $\mu$ M or 100  $\mu$ M GTD followed by infection with VSV (MOI = 0.1 or 1) for 12 h. c-d. ELISA analysis of TNF- $\alpha$  (c) and IL-6 (d) in macrophages treated with 10  $\mu$ M or 100  $\mu$ M GTD followed by infection with VSV for 24h. e. qRT-PCR analysis of TNF- $\alpha$  and IL-6 in macrophages treated with 10  $\mu$ M or 100  $\mu$ M GTD followed by infection with HSV-1 for the indicated time. f. ELISA analysis of TNF- $\alpha$  and IL-6 in macrophages treated with 10  $\mu$ M or 100  $\mu$ M GTD followed by infection with HSV-1 for 24h. Data are presented as the mean  $\pm$  SD. and are representative of three independent experiments. \* $p < 0.05$ .

**Supplementary figure 2. GTD does not affect the activations of p38, ERK, JNK, p65, TBK1 and IRF7.**

**a**

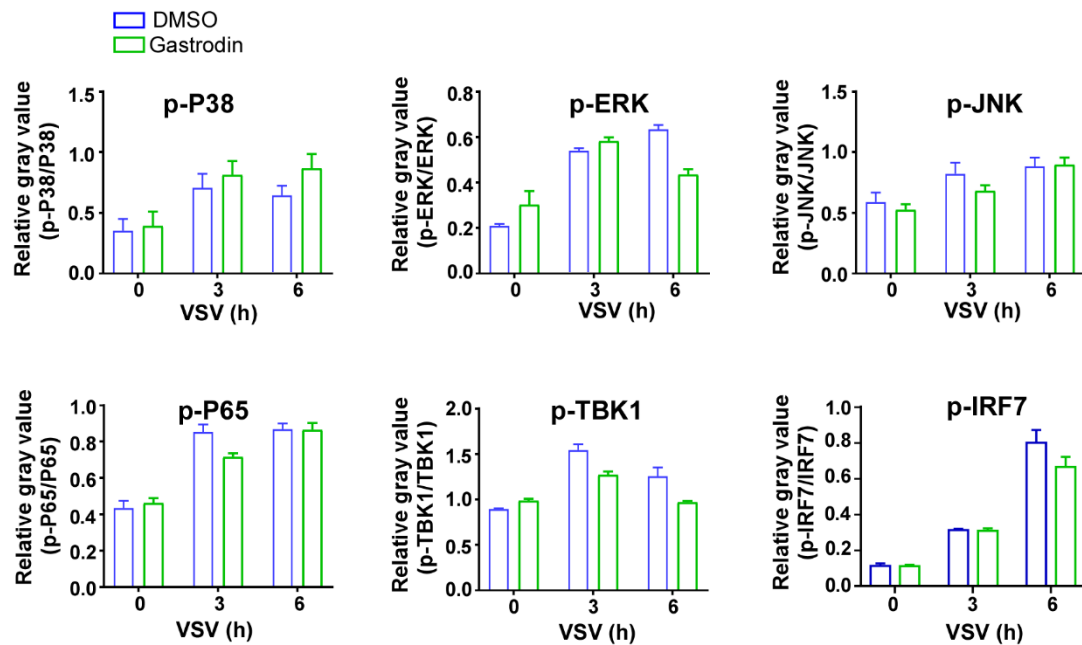

**b**

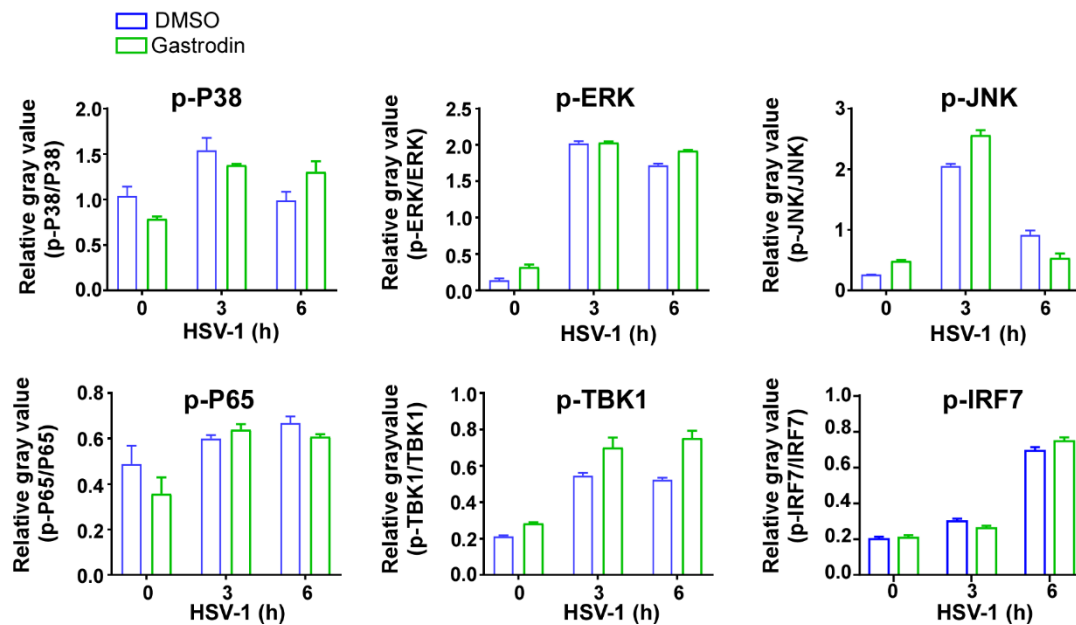

**a.** Grayscale values of immunoblot analysis of phosphorylated (p-) or total proteins in lysates of macrophages treated as in figure 6a. **b.** Grayscale values of immunoblot analysis of phosphorylated (p-) or total proteins in lysates of macrophages treated as in

figure 6c. Data are presented as the mean  $\pm$  SD. and are representative of three independent experiments.
